# Supplementary material
Source: PubMed Central journal article supplement (PMC5494834)
Supplement: NIHMS860229-supplement.pdf [file NIHMS860229-supplement.pdf]

## Supplemental Figure Legends

**Figure S1, related to Figure 1.  $\beta$ -klotho adipose-specific knockout mice have normal body weight and insulin sensitivity.** (A) Western blot analysis of KLB protein expression in epididymal white adipose tissue (eWAT) and brown adipose tissue (BAT) of WT and  $\beta$ -klotho adipose-specific knockout mice (KLB AdipoKO) mice.  $\beta$ -actin serves as a loading control. (B-D) *Egr1* and *cFos* mRNA expression in (B) eWAT, (C) BAT, and (D) liver of WT and KLB AdipoKO mice (n = 6-7/group) administered vehicle or FGF21 (1 mg/kg) via i.p. injection for 1 hour. (E) Body weights of lean, 12-14 week old, male KLB AdipoKO mice and WT littermate controls (n = 6/group). (F) Insulin tolerance tests in the mice in (E) (n = 6/group). (G) Body weights of diet-induced obese (DIO), male KLB AdipoKO mice and WT littermate controls (n = 6/group). (H) Insulin tolerance tests in the mice in (G) (n = 6/group). (I) Fold change of adiponectin levels in media of primary white adipocytes treated with vehicle or FGF21 (1  $\mu$ g/mL) for the indicated time. (J) Plasma glucose levels in 12-14 week old, male WT and Adiponectin knockout (Adipoq KO) littermates co-injected with insulin and either vehicle or FGF21 (1 mg/kg) (n = 6/group). Values are mean  $\pm$  SEM. (\*,  $P < 0.05$ ; \*\*,  $P < 0.01$ ; \*\*\*,  $P < 0.005$ ; and #,  $P < 0.001$  compared to WT).

**Figure S2, related to Figure 2. FGF21 induces brown adipose tissue metabolic gene expression.** *Bmp8b* and *Zbtb16* mRNA expression in brown adipose tissue (BAT) of diet-induced obese (DIO) WT and Adiponectin (Adipoq) KO mice administered vehicle or FGF21 for 3 weeks via i.p. injection (n = 5-9/group). Values are mean  $\pm$  SEM. (\*,  $P < 0.05$ ; \*\*\*,  $P < 0.005$  compared to WT).

**Figure S3, related to Figure 3. Generation of inducible, adipose-specific, constitutively active FGFR1 transgenic mice.** (A) Plasma insulin levels during glucose tolerance tests in DIO WT and KLB AdipoKO mice after 2 weeks daily intraperitoneal (i.p.) injection of vehicle or FGF21 (1 mg/kg) (n = 5-8/group). (B) Area under the curve (AUC) for mice in (A). (C) Body weights and (D) percent fat mass of wild-type (WT), TRE-caFGFR1 transgenic, and Adipo-rtTa/TRE-caFGFR1 double transgenic mice were induced to obesity by 12 weeks of high fat diet (HFD) feeding (no doxycycline (DOX); n = 7-10/group). (E) *caFGFR1* mRNA expression in epididymal white adipose tissue (eWAT), subcutaneous white adipose tissue (scWAT), and brown adipose tissue (BAT) of DIO WT, TRE-caFGFR1 transgenic, and Adipo-rtTa/TRE-caFGFR1 double transgenic mice on HFD + DOX for 2 weeks (n = 7-10/group). (F) Western blot analysis of Myc and phospho-ERK1/2 expression in skeletal muscle (SKM) from mice with the indicated genotypes. Total ERK served as a loading control. (G) Plasma triglyceride levels in DIO WT, TRE-caFGFR1 transgenic, and Adipo-rtTa/TRE-caFGFR1 double transgenic mice on HFD + Dox for 2 weeks. Values are mean +/- SEM. (\*,  $P < 0.05$ ; #,  $P < 0.001$  compared to WT).

**Figure S4, related to Figure 4. Generation and characterization of KLB BatKO mice.**

(A) Western blot analysis of KLB protein expression in brown adipose tissue (BAT) and epididymal white adipose tissue (eWAT) of WT and  $\beta$ -klotho brown adipose tissue-specific knockout mice (KLB BatKO) mice.  $\beta$ -actin serves as a loading control. (B-D) *Egr1* and *cFos* mRNA expression in (B) eWAT, (C) BAT, and (D) liver of WT and KLB BatKO mice (n = 5-7/group) administered vehicle or FGF21 (1 mg/kg) via i.p. injection for 1 hour. (E) Plasma glucose levels plasma in 12-14 week old, male KLB BatKO mice and WT littermates co-injected with insulin and either vehicle or FGF21 (1 mg/kg) (n = 6/group). (F) *Insulin receptor (IR)*

mRNA levels in epididymal white adipose tissue (eWAT), subcutaneous WAT (scWAT), brown adipose tissue (BAT), and liver of WT and insulin receptor adipose-specific knockout mice (IR AdipoKO) mice (n = 5-7/group). (G) Plasma glucose levels plasma in 12-14 week old, male IR AdipoKO mice and WT littermates co-injected with insulin and either vehicle or FGF21 (1 mg/kg) (n = 5-7/group). Values are mean +/- SEM. (\*,  $P < 0.05$ ; \*\*,  $P < 0.01$ ; \*\*\*,  $P < 0.005$ ; and #,  $P < 0.001$  compared to WT).

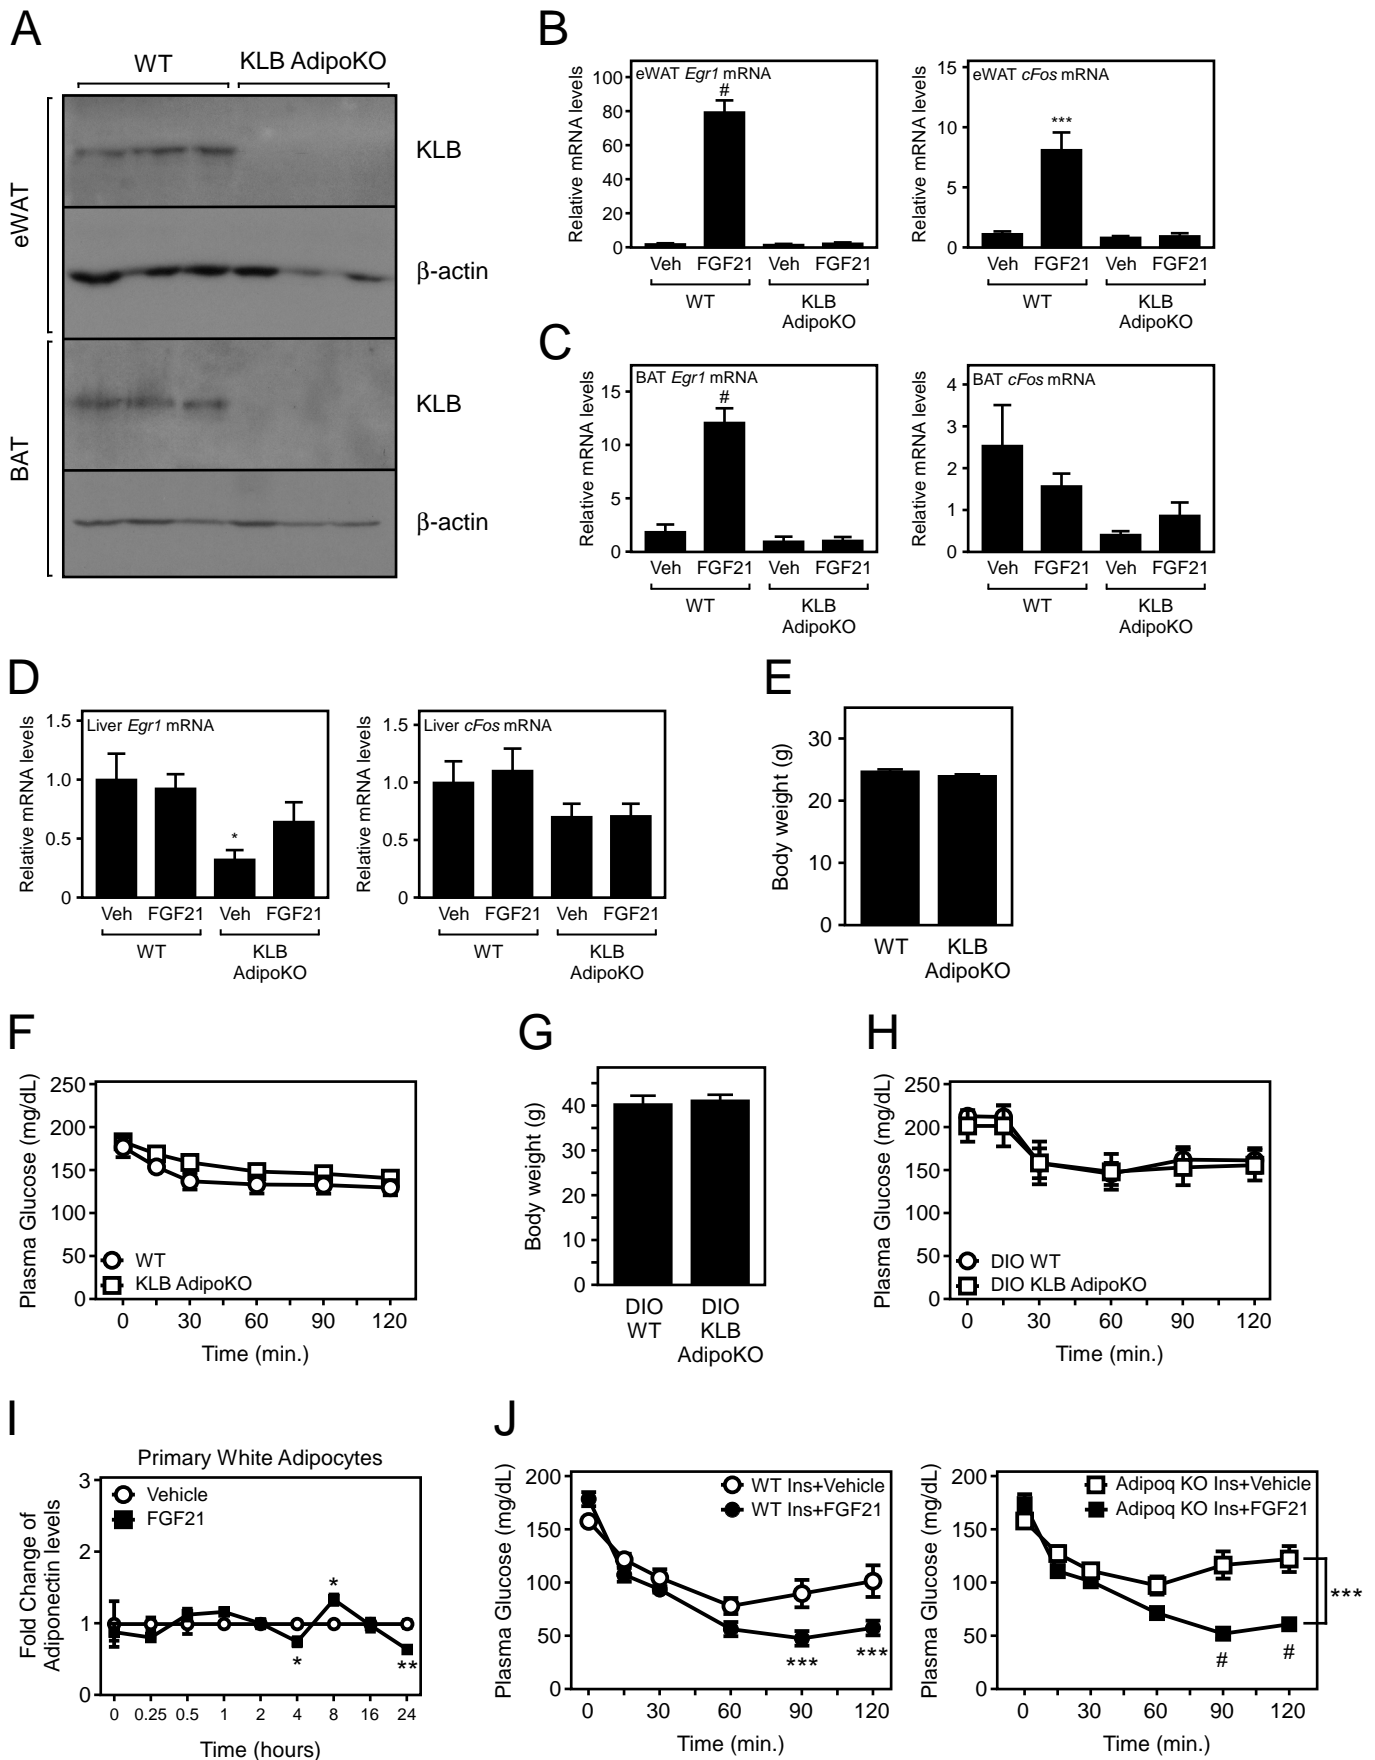

Figure S1

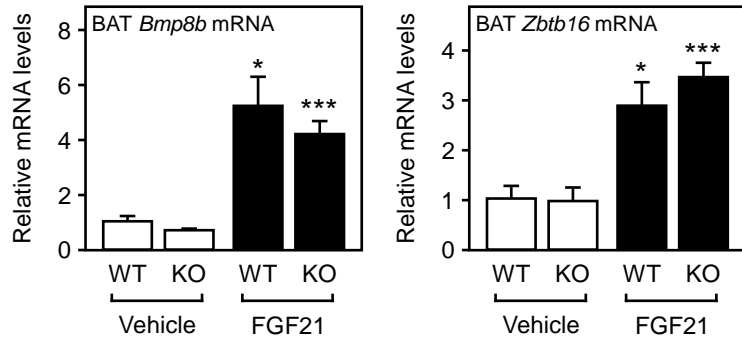

Figure S2

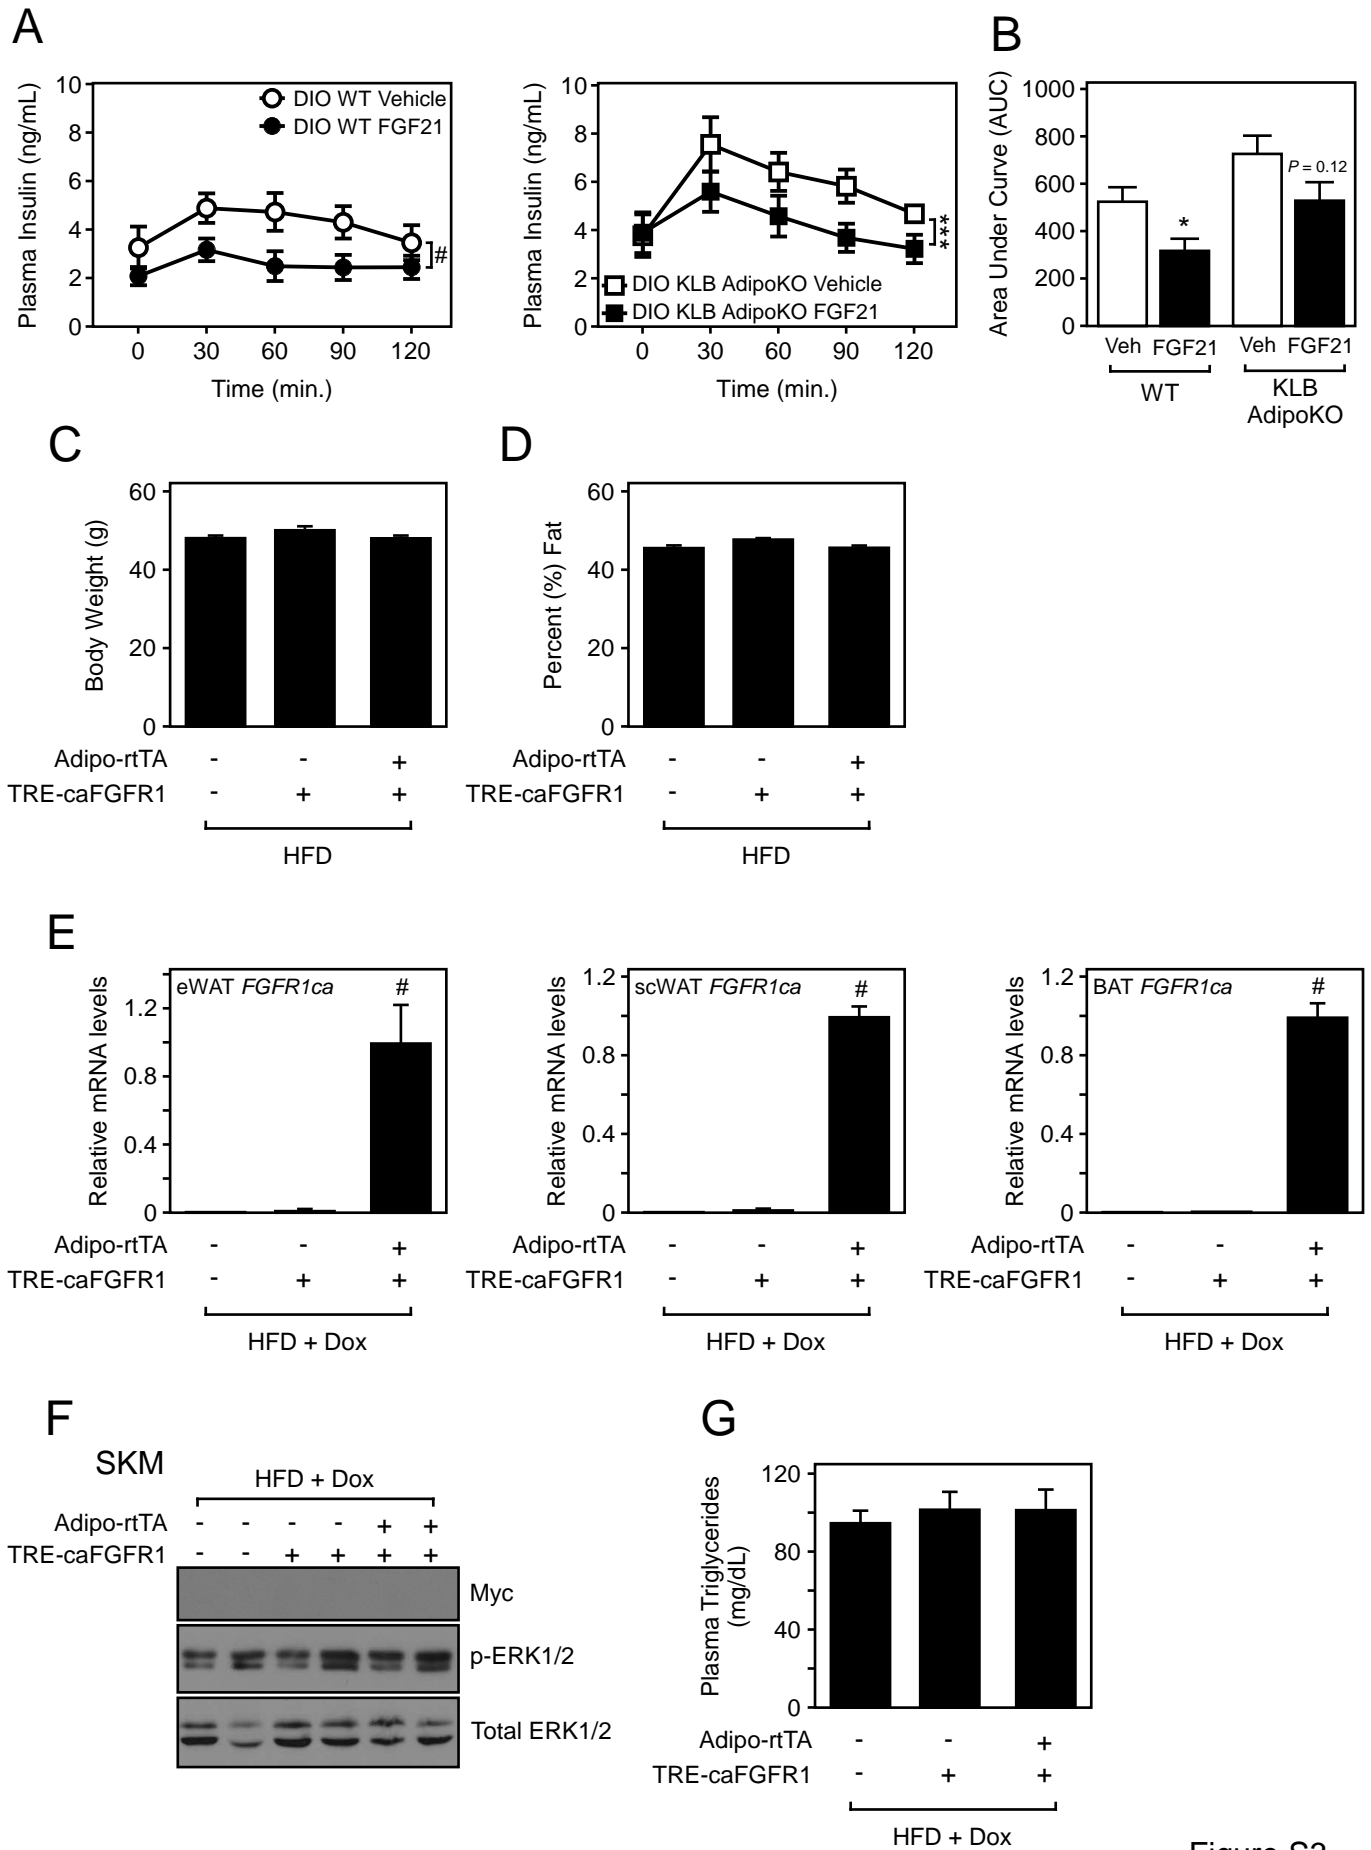

Figure S3

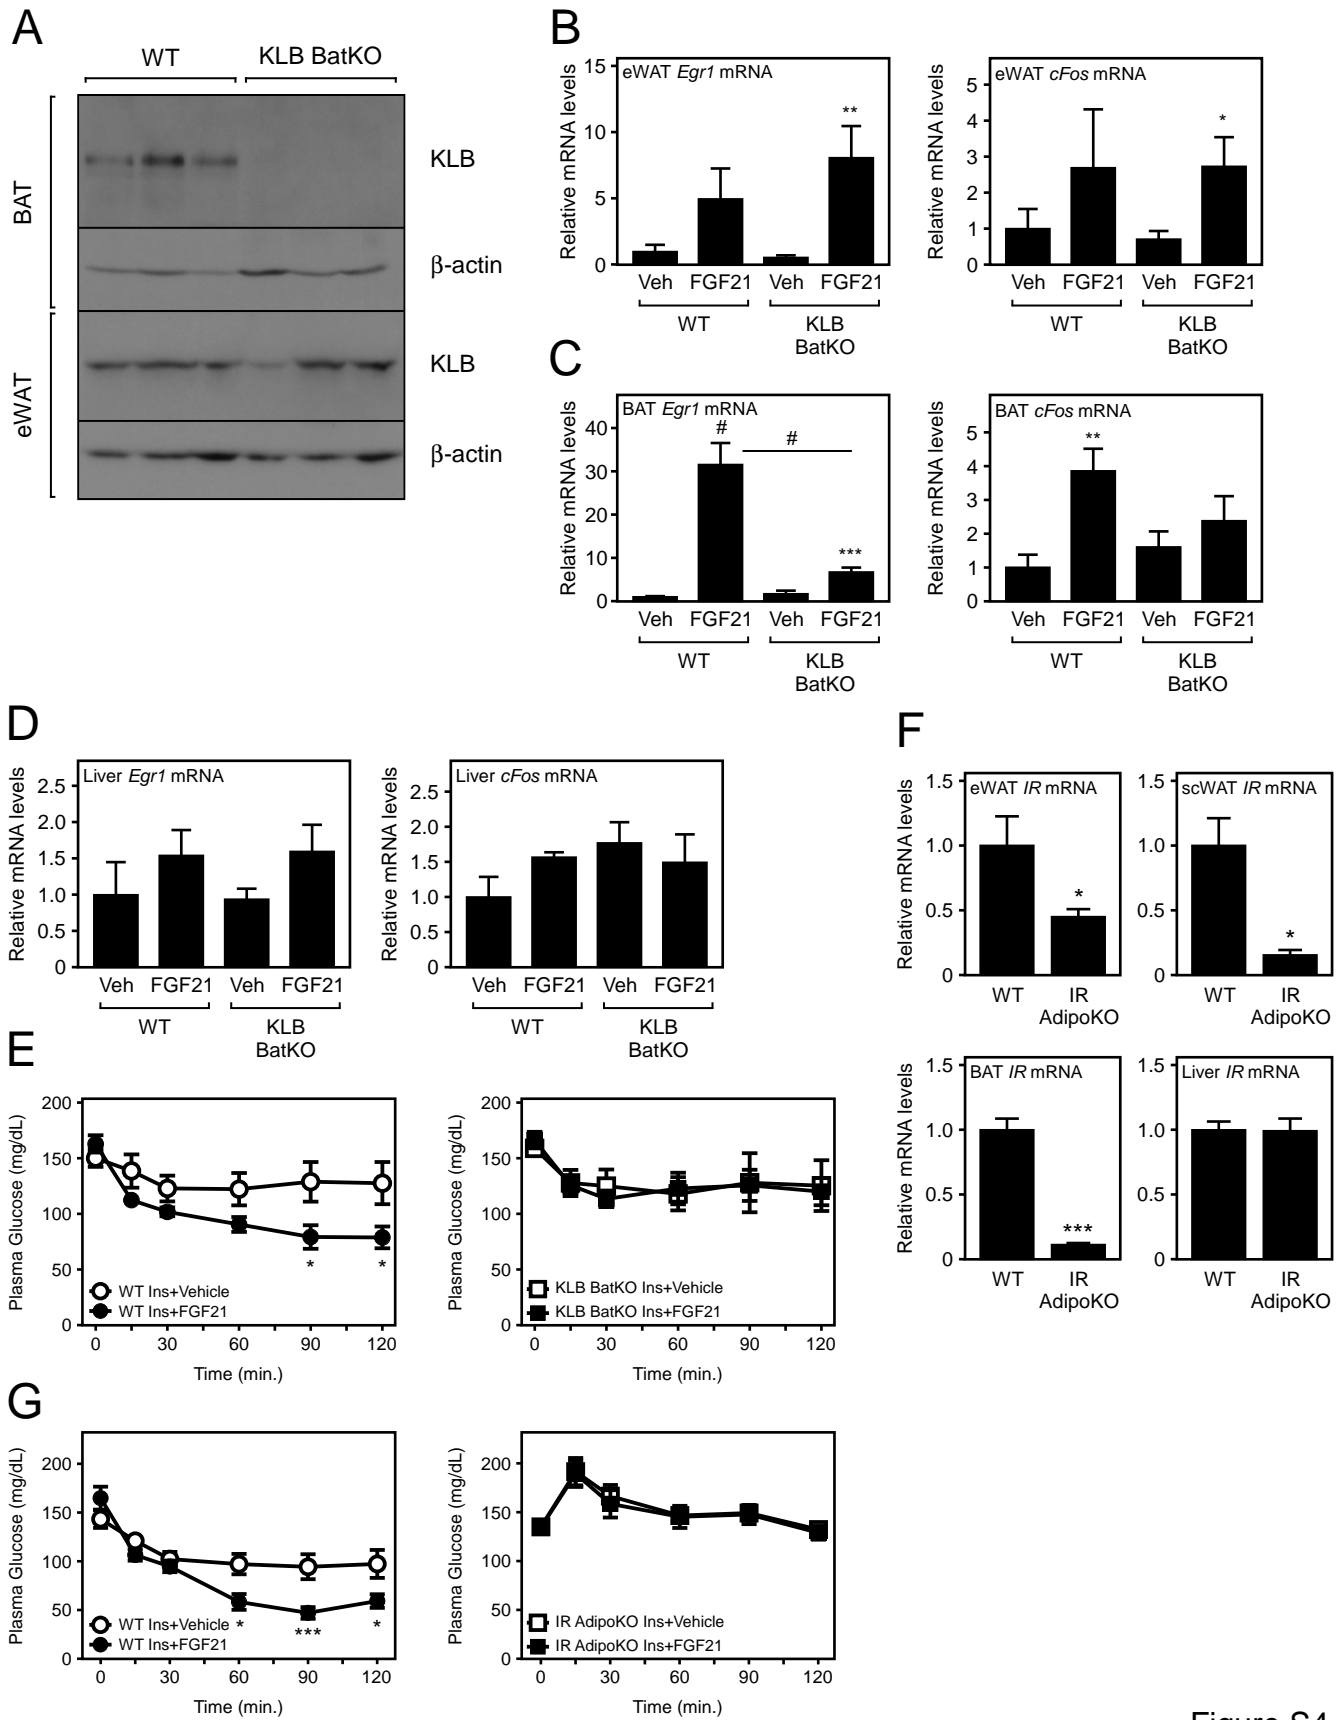

Figure S4
